# Supplementary material for: Isothermal crystallization and time-temperature-transformation diagram of the organic semiconductor 5,11-bis(triethylsilylethynyl)anthradithiophene
Source: Royal Society of Chemistry journal article supplement (doi:10.1039/d1tc01482j), 2021-01-01
Supplement: d1tc01482j1.pdf [file d1tc01482j1.pdf]

## Supporting Information

### **Isothermal crystallization and time-temperature-transformation diagram of the organic semiconductor 5,11-bis(triethylsilylethynyl)anthradithiophene**

Liyang Yu,<sup>a,b\*</sup> Andrew M. Zeidell,<sup>c</sup> John E. Anthony,<sup>d</sup> Oana Jurchescu,<sup>c</sup> Christian Müller<sup>b\*</sup>

<sup>a</sup>School of Chemical Engineering, Sichuan University, Chengdu 610064, P. R. China

<sup>b</sup>Department of Chemistry and Chemical Engineering, Chalmers University of Technology, 41296 Gothenburg, Sweden

<sup>c</sup>Department of Physics, Wake Forest University, Winston-Salem, NC 27109, USA

<sup>d</sup>Center for Applied Energy Research, University of Kentucky, Lexington, KY 40511, USA

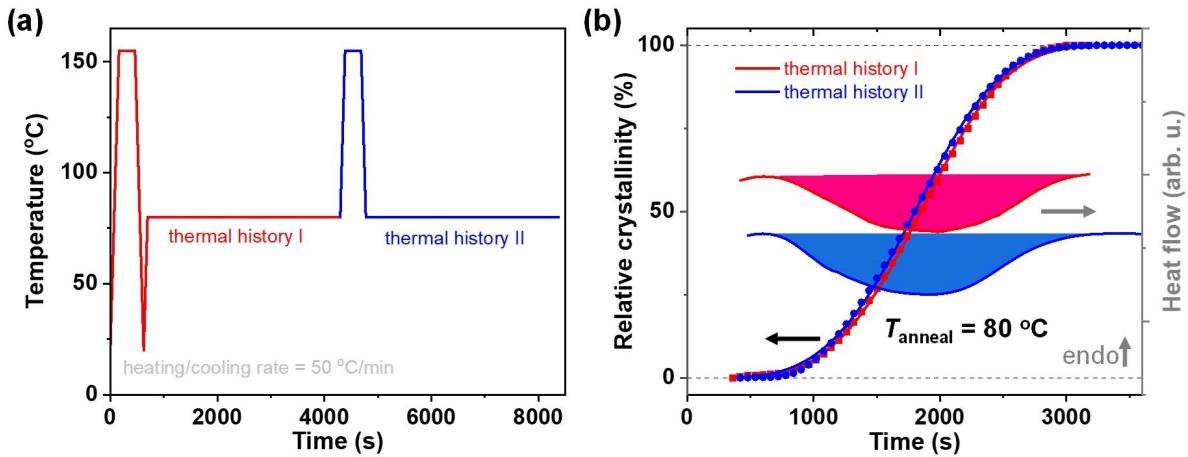

**Figure S1.** Comparison of the thermal history of TES-ADT quenched from 155 to 20 °C followed by heating to  $T_{\text{anneal}} = 80 \text{ °C}$  (red) and from 155 °C directly to  $T_{\text{anneal}} = 80 \text{ °C}$  (blue). (a) Temperature program of DSC measurements performed with a DSC 200 from Netzsch equipped with a manual liquid N<sub>2</sub> cooling system with heating and cooling rate of 50 °C ; and (b) isothermal DSC thermograms of TES-ADT annealed at  $T_{\text{anneal}} = 80 \text{ °C}$  with different thermal histories as illustrated in (a) and the respective integrated relative crystallinity  $X_c(t)$  as a function of time  $t$  (symbols) and best fits with the Avrami equation (solid lines).

**Table S1.** Summary of parameters describing the crystallization kinetics obtained from thermal analysis presented in Figure S1.

| Thermal history | $t_{\text{onset}} \text{ (s)}$ | $t_{\text{mid}} \text{ (s)}$ | $t_{\text{endset}} \text{ (s)}$ | $t_0 \text{ (s)}$ | $\tau \text{ (s)}$ | $m$  |
|-----------------|--------------------------------|------------------------------|---------------------------------|-------------------|--------------------|------|
| I               | 1000                           | 1848                         | 2646                            | 118               | 1910               | 3.70 |
| II              | 994                            | 1799                         | 2625                            | 80                | 1901               | 3.69 |

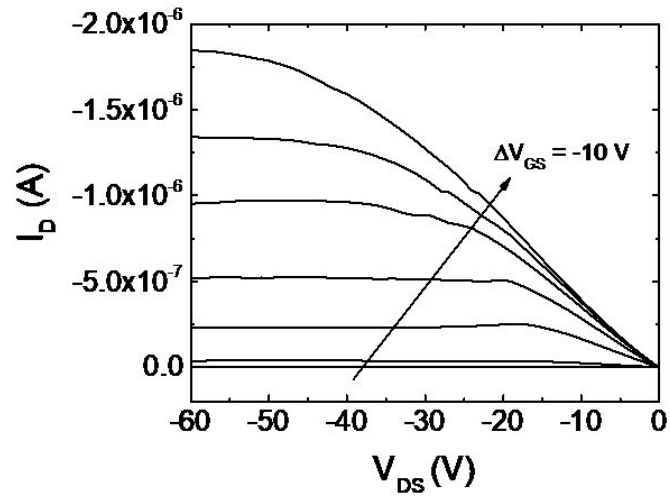

**Figure S2.** Output characteristics of FET device in Figure 4a.

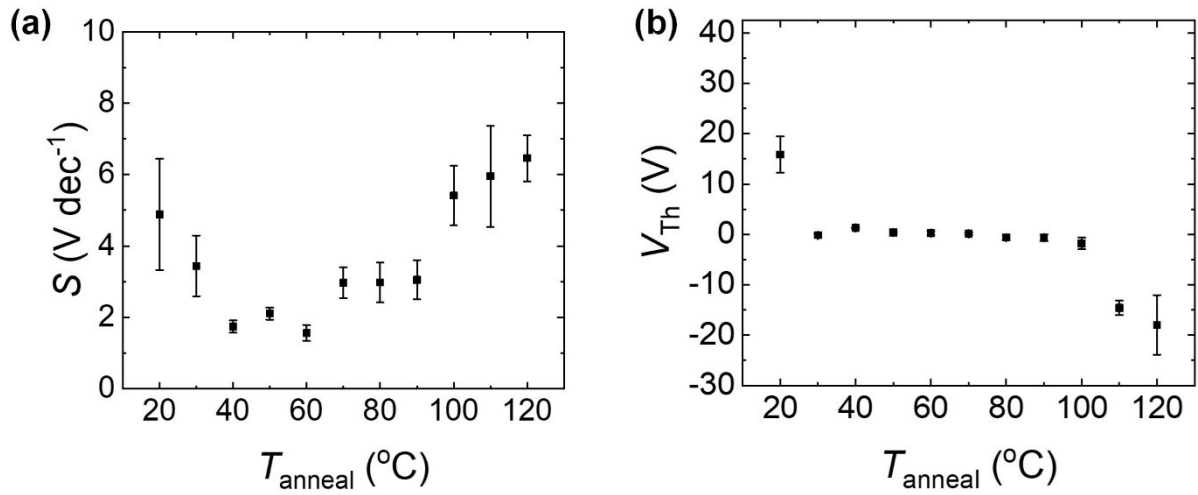

**Figure S3.** Plots illustrating subthreshold slope (a) and threshold voltage (b) of the FET devices against the annealing temperature.
